# Supplementary material
Source: Research Square preprint supplement (doi:10.21203/rs.3.rs-9214724/v1)
Supplement: Supplementary file 1 [file d2a10ab4a1e36807e0b0386a.docx]

**Supplementary File: Research Instrument**

**ICU Challenges Checklist — English Version**

**Manuscript Title:** Resource Allocation Challenges in Critical Care Nursing: A Cross-Sectional Study of Public Hospitals

**Authors:** Arjunbhai M. Chauhan, Jerusa J. Gohil, Sampreeth Naidu Yellapu

**Journal:** BMC Health Services Research

**Submission ID:** 6fa0a8a9-ce9b-4d9d-a753-b0d486837a73

**Instrument Overview**

**Tool Title:** Checklist to Assess the Challenges Faced by Staff Nurses Working in Critical Care Units of Government Civil Hospital and GMERS Hospital, Ahmedabad District

**Tool Type:** Self-administered, dichotomous (Yes/No) checklist

**Developed by:** Arjunbhai M. Chauhan, 2nd Year Nurse Practitioner in Critical Care (N.P.C.C.), Post Graduate Residency Programme, Govt. College of Nursing, GINERA, Ahmedabad (Gujarat University, 2019)

**Purpose:** To assess and compare the operational challenges faced by staff nurses working in critical care units of two major public hospitals in Ahmedabad District, Gujarat, India.

**Structure:** The tool comprises two sections:

- **Section A:** Socio-Demographic Variables (8 items)
- **Section B:** Challenges Checklist (20 items across 4 domains)

**Validation:** Content validity established by a panel of 5 medical and surgical nursing experts (Content Validity Index, CVI = 0.85); pilot tested on 20 ICU nurses (Cronbach's α = 0.68, acceptable for exploratory dichotomous instruments per Nunnally, 1994).

**SECTION A: Socio-Demographic Variables**

**1. Age**

- A. 21–30 Years
- B. 31–40 Years
- C. 41–50 Years
- D. 51–58 Years

**2. Gender**

- A. Male
- B. Female
- C. Transgender

**3. Religion**

- A. Hindu
- B. Muslim
- C. Christian
- D. Other

**4. Professional Qualification**

- A. GNM (General Nursing and Midwifery)
- B. BSc. Nursing / Post Basic BSc. Nursing
- C. MSc. Nursing / P.G. Nursing
- D. Any Other [Please Specify: ________________]

**5. Working Hospital**

- A. Civil Hospital, Ahmedabad
- B. GMERS Sola Civil Hospital

**6. Working Department**

- [Please Specify: ________________]

**7. Years of Experience**

- A. < 1 Year
- B. 1–5 Years
- C. 5–10 Years
- D. Above 10 Years

**8. Attended Any Training Related to Critical Care**

- A. Yes [If Yes, Specify: ________________]
- B. No

**SECTION B: Challenges Checklist**

**Instructions:**

- Place a tick (√) in the appropriate column against each statement.
- Respond as **"YES"** or **"NO"**.
- If you have faced this challenge often, respond **YES**.
- If you do not face this challenge, or face it infrequently or not at all, respond **NO**.

**Domain 1: Human Resources / Material Resources**

| No. | Statement | YES | NO |
| --- | --- | --- | --- |
| 1. | In CCU, Patient–Nurse Ratio for Non-Ventilated Patient is 2:1. |  |  |
| 2. | In CCU, Patient–Nurse Ratio for Ventilated Patient is 1:1. |  |  |
| 3. | CCU is headed by a Full-Time Intensive Care Specialist. |  |  |
| 4. | In CCU, the routine duties and responsibilities of Nursing personnel are specified. |  |  |
| 5. | In CCU, sufficient advance life-supporting systems are available. |  |  |
| 6. | In CCU, sufficient lifesaving medicines are available. |  |  |
| 7. | In CCU, a Nurses' room is available with basic facilities. |  |  |
| 8. | CCU Nurses received training related to all advance healthcare devices. |  |  |

**Domain 2: Stressors in ICU**

| No. | Statement | YES | NO |
| --- | --- | --- | --- |
| 9. | In CCU, the working atmosphere is stressful. |  |  |
| 10. | CCU Nurses have adequate time to complete the work assigned to them. |  |  |
| 11. | In CCU, working hours are more during night duty. |  |  |
| 12. | In CCU, the possibility of infection from patients is high. |  |  |
| 13. | In CCU, lack of appreciation for Nurses' efforts is observed. |  |  |
| 14. | In CCU, conflicts between Nurses and Doctors are sometimes seen. |  |  |
| 15. | Instability in family life occurs due to increased working hours and night shifts. |  |  |

**Domain 3: Problem in Management of Unit**

| No. | Statement | YES | NO |
| --- | --- | --- | --- |
| 16. | Dealing with severe medical conditions and Medico-Legal Cases with little or no hope of recovery. |  |  |
| 17. | Dealing with patients with different values and beliefs. |  |  |
| 18. | Dealing with patients who do not adhere to instructions. |  |  |

**Domain 4: Visitor Management in ICU**

| No. | Statement | YES | NO |
| --- | --- | --- | --- |
| 19. | In CCU, written regulations for patients' families are available. |  |  |
| 20. | In CCU, adequate and suitable visitor rooms are available for patients' family members / relatives. |  |  |

**Instrument Scoring Guide**

| Domain | Items | No. of Items | Maximum Score |
| --- | --- | --- | --- |
| Human Resources / Material Resources | 1–8 | 8 | 8 |
| Stressors in ICU | 9–15 | 7 | 7 |
| Problem in Management of Unit | 15-18 | 3 | 3 |
| Visitor Management in ICU | 19-20 | 2 | 2 |
| **TOTAL** | **1–20** | **20** | **20** |

**Scoring:** Each "YES" = 1 point; each "NO" = 0 points.
Higher domain scores indicate greater challenge burden in that domain.

**Validation Documentation Summary**

| Validation Parameter | Detail |
| --- | --- |
| Expert Panel Size | 5 (Medical and Surgical Critical Care Nursing specialists) |
| Content Validity Index (CVI) | 0.85 |
| Pilot Study Sample | n = 20 ICU nurses (tertiary hospital, not included in main study) |
| Cronbach's Alpha (α) | 0.68 (acceptable for exploratory dichotomous tools per Nunnally & Bernstein, 1994) |
| Tool Development Date | January 2019 |
| Academic Context | Gujarat University, NPCC Post Graduate Residency Programme |

*For queries regarding the instrument, please contact the corresponding author: Sampreeth Naidu Yellapu,* [*sampreeth.yellapu30102@paruluniversity.ac.in*](mailto:sampreeth.yellapu30102@paruluniversity.ac.in)
